# Supplementary material for: Asymmetric exponential amplification reaction on a toehold/biotin featured template: an ultrasensitive and specific strategy for isothermal microRNAs analysis
Source: PubMed Central journal article supplement (PMC5009742; doi:10.1093/nar/gkw504), 2016-06-02
Supplement: supp_gkw504_nar-00483-met-g-2016-File004.pdf [file supp_gkw504_nar-00483-met-g-2016-File004.pdf]

## Supplementary Information

### **Asymmetric exponential amplification reaction on a toehold/biotin featured template: an ultrasensitive and specific strategy for isothermal microRNAs analysis**

Jun Chen<sup>1</sup>, Xueqing Zhou<sup>1</sup>, Yingjun Ma<sup>1</sup>, Xiulian Lin<sup>2</sup>, Zong Dai<sup>1,\*</sup> and Xiaoyong Zou<sup>1,3</sup>

---

1 School of Chemistry and Chemical Engineering, Sun Yat-Sen University

135 Xingang West Road, Guangzhou, China 510275

E-mail: daizong@mail.sysu.edu.cn

2 College of Pharmacy, Guangdong Pharmaceutical University, Guangzhou 510006,

P. R. China

3 SYSU-CMU Shunde International Joint Research Institute, Shunde, Guangdong

528300, P. R. China

## Contents

|                                                                          |     |
|--------------------------------------------------------------------------|-----|
| S1. Sequences of the used oligonucleotides.....                          | S3  |
| S2. Mathematical model of EXPAR.....                                     | S4  |
| S3. Amplification fold simulation.....                                   | S6  |
| S4. Hybridization of primer with standard or biotin template.....        | S6  |
| S5. Ideal and experimental amplification fold.....                       | S7  |
| S6. EXPAR with biotin-template-2,6.....                                  | S7  |
| S7. Optimization of the amount of DNA polymerase.....                    | S8  |
| S8. Optimization of the amount of NEase.....                             | S9  |
| S9. Optimization of the amount of template.....                          | S10 |
| S10. Optimization of reaction temperature.....                           | S11 |
| S11. Estimation of interference of EXPAR.....                            | S11 |
| S12. Melting temperature investigation of toehold/biotin-template-2..... | S13 |
| S13. Comparison of the analytical performance of different methods.....  | S13 |

**S1. Table S1.** Sequences of the used oligos<sup>a</sup>

| Name                                  | Sequence                                                                                                                    |
|---------------------------------------|-----------------------------------------------------------------------------------------------------------------------------|
| let-7a                                | 5'-UGAGGUAGUAGGUUGUAUAGUU-3'                                                                                                |
| let-7b                                | 5'-UGAGGUAGUAGGUUGUGUGGUU-3'                                                                                                |
| let-7c                                | 5'-UGAGGUAGUAGGUUGUAUGGUU-3'                                                                                                |
| let-7d                                | 5'-AGAGGUAGUAGGUUGC AUAGU-3'                                                                                                |
| let-7e                                | 5'-UGAGGUAGGAGGUUGUAUAGU-3'                                                                                                 |
| let-7f                                | 5'-UGAGGUAGUAGAUUGUAUAGUU-3'                                                                                                |
| let-7g                                | 5'-UGAGGUAGUAGUUUGUACAGU-3'                                                                                                 |
| let-7i                                | 5'-UGAGGUAGUAGUUUGUGCUGUU-3'                                                                                                |
| BHQ1/BHQ3-labelled<br>let-7a          | 5'-BHQ1-UGAGGUAGUAGGUUGUAUAGUU-BHQ3-3'                                                                                      |
| Standard template                     | 5'-AACTATACAACCTACTACCTCAA <u>ACAGACTCAA</u> ACTATACAACCT<br>ACTACCTCAA-3'                                                  |
| FAM/CY5-labelled<br>standard template | 5'-CY5-AACTATACAACCTACTACCTCAA <u>ACAGACTCAA</u> ACTATACAA<br>CCTACTACCTCAA-FAM-3'                                          |
| Biotin-template-1                     | 5'-A(Biotin)ACTATACAACCTACTACCTCAA <u>ACAGACTCAA</u> ACTATAC<br>AACCTACTACCTCAA-3'                                          |
| Biotin-template-2                     | 5'-AA(Biotin)CTATACAACCTACTACCTCAA <u>ACAGACTCAA</u> ACTATAC<br>AACCTACTACCTCAA-3'                                          |
| Biotin-template-6                     | 5'-AACTAT(Biotin)ACAACCTACTACCTCAA <u>ACAGACTCAA</u> ACTATAC<br>AACCTACTACCTCAA-3'                                          |
| Biotin-template-10                    | 5'-AACTATACAA(Biotin)CCTACTACCTCAA <u>ACAGACTCAA</u> ACTATAC<br>AACCTACTACCTCAA-3'                                          |
| Biotin-template-14                    | 5'-AACTATACAACCTA(Biotin)CTACCTCAA <u>ACAGACTCAA</u> ACTATAC<br>AACCTACTACCTCAA-3'                                          |
| Biotin-template-18                    | 5'-AACTATACAACCTACTAC(Biotin)CTCAA <u>ACAGACTCAA</u> ACTATAC<br>AACCTACTACCTCAA-3'                                          |
| Biotin-template-2,6                   | 5'-AA(Biotin)CTAT(Biotin)ACAACCTACTACCTCAA <u>ACAGACTCAA</u> ACT<br>ATACAACCTACTACCTCAA-3'                                  |
| FAM/CY5-labelled<br>biotin-template-2 | 5'-CY5-AA(Biotin)CTATACAACCTACTACCTCAA <u>ACAGACTCAA</u> ACTA<br>TACAACCTACTACCTCAA-FAM-3'                                  |
| Toehold/biotin-template-2             | 5'-AA(Biotin)CTATACAACCTACTACCTCAA <u>ACAGACTCAA</u> ACTATAC<br>AACCTACTACCTCATAAGTTACAACCTCATAACCAAACCTTATGAGGTA<br>GTA-3' |
| Forward primer                        | 5'-CGTCGTGAGGTAGTAGGTTG-3'                                                                                                  |
| Reverse primer                        | 5'-GTGCAGGGTCCGAGG-3'                                                                                                       |
| RT primer                             | 5'-GTCGTATCCAGTGCAGGGTCCGAGGTATTCGCACTGGATACGA<br>CAACTAT-3'                                                                |

<sup>a</sup>The underlined region identifies the complement of Nt.BstNBI recognition site.

## S2. Mathematical model of EXPAR

Assuming that annealing is a bimolecular and single-step reaction, the EXPAR can be regarded as a consecutive reaction:

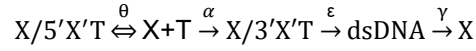

The consecutive reaction composes the following four reactions.

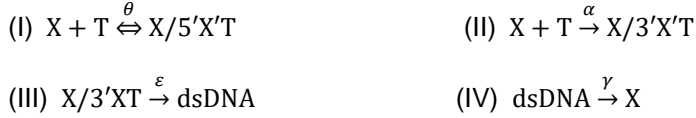

Where  $\theta$  and  $\alpha$  are the annealing rates of the X hybrid with 5'X'T and 3'X'T, respectively,  $\varepsilon$  is the conversion rate from X/3'X'T to dsDNA,  $\gamma$  is the productive rate of X by dsDNA, thus,

$$\begin{aligned} \frac{dc_X}{dt} &= -\theta c_X c_T & \frac{dc_X}{dt} &= -\alpha c_X c_T & \frac{dc_{X3'X'T}}{dt} &= -\varepsilon c_{X3'X'T} \\ \frac{dc_{\text{dsDNA}}}{dt} &= -\gamma c_{\text{dsDNA}} & \frac{dc_T}{dt} &= -\theta c_X c_T & \frac{dc_T}{dt} &= -\alpha c_X c_T \\ \frac{dc_{\text{dsDNA}}}{dt} &= \varepsilon c_{X3'X'T} & \frac{dc_X}{dt} &= \gamma c_{\text{dsDNA}} & \frac{dc_{X5'X'T}}{dt} &= \theta c_X c_T \\ \frac{dc_{X3'X'T}}{dt} &= \alpha c_X c_T \end{aligned}$$

Therefore,

$$\frac{dc_X}{dt} = \gamma c_{\text{dsDNA}} - \theta c_X c_T - \alpha c_X c_T \quad (1)$$

$$\frac{dc_T}{dt} = -\theta c_X c_T - \alpha c_X c_T \quad (2)$$

$$\frac{dc_{X3'X'T}}{dt} = \alpha c_X c_T - \varepsilon c_{X3'X'T} \quad (3)$$

$$\frac{dc_{X5'X'T}}{dt} = \theta c_X c_T \quad (4)$$

$$\frac{dc_{\text{dsDNA}}}{dt} = \varepsilon c_{X3'X'T} - \gamma c_{\text{dsDNA}} \quad (5)$$

Due to the strand-displacement activity of polymerase, a new dsDNA is formed as soon as a new X is produced in  $\text{dsDNA} \rightarrow X$ . The alteration of  $c_{\text{dsDNA}}$  can be ignored. Thus,

$$\frac{dc_{\text{dsDNA}}}{dt} \approx \varepsilon c_{X3'X'T} \quad (6)$$

The exponential phase occurs early in the amplification reaction before the template becomes exhausted, where  $c_T \approx c_{T0}$ , but after  $C_{\text{DS}}$  reaches a steady ratio ( $\lambda$ ) with  $c_{X3'X'T}$ , that is,

$$\frac{c_{\text{dsDNA}}}{c_{X3'X'T}} = \lambda \quad (7)$$

$$\frac{dc_{dsDNA}}{dt} = \lambda \frac{dc_{X3/X'T}}{dt} \quad (8)$$

Substitute Eq. (8) into Eq. (6), we can acquire

$$\frac{dc_{dsDNA}}{dt} = \varepsilon c_{X3/X'T} = \lambda \frac{dc_{X3/X'T}}{dt} \quad (9)$$

Substitute Eq. (3) into Eq. (9), we can obtain

$$\varepsilon c_{X3/X'T} = \lambda(\alpha c_X c_{T_0} - \varepsilon c_{X3/X'T}) \quad (10)$$

The Eq. (10) has a solution of

$$c_{X3/X'T} = \frac{\lambda}{\varepsilon(\lambda+1)} \alpha c_X c_{T_0} \quad (11)$$

Substitution of Eq. (11) into Eq. (7), we get

$$c_{dsDNA} = \lambda c_{X3/X'T} = \frac{\lambda^2}{\varepsilon(\lambda+1)} \alpha c_X c_{T_0} \quad (12)$$

Assuming that  $\varphi$  ( $1 \geq \varphi \geq 0$ ) is the ratio of primer that forms extensible primer-template at every round of EXPAR, that is

$$\frac{c_{X3/X'T}}{c_{X5/X'T}} = \frac{\varphi}{1-\varphi} \quad (13)$$

$$\frac{dc_{X3/X'T}}{dt} = \frac{\varphi}{1-\varphi} \frac{dc_{X5/X'T}}{dt} \quad (14)$$

Substitute Eq. (14) into Eq. (3), we can obtain

$$\frac{dc_{X3/X'T}}{dt} = \alpha c_X c_{T_0} - \varepsilon c_{X3/X'T} = \frac{\varphi}{1-\varphi} \frac{dc_{X5/X'T}}{dt} \quad (15)$$

Substitute Eq. (11) into Eq. (15), we can obtain

$$\frac{dc_{X3/X'T}}{dt} = \frac{1}{(\lambda+1)} \alpha c_X c_{T_0} = \frac{\varphi}{1-\varphi} \frac{dc_{X5/X'T}}{dt} \quad (16)$$

Substitute Eq. (4) into Eq. (16), we can obtain

$$\frac{dc_{X3/X'T}}{dt} = \frac{1}{(\lambda+1)} \alpha c_X c_{T_0} = \frac{\varphi}{1-\varphi} \frac{dc_{X5/X'T}}{dt} = \frac{\theta \varphi}{1-\varphi} c_X c_{T_0} \quad (17)$$

From the Eq. (17), we can obtain

$$\theta = \frac{1-\varphi}{\varphi(\lambda+1)} \alpha \quad (18)$$

Substitution of Eq. (12) and (18) into Eq. (1), a new rate equation can be obtained,

$$\frac{dc_X}{dt} = \left[ \frac{\gamma \lambda^2}{\varepsilon(\lambda+1)} \alpha c_{T_0} - \frac{1-\varphi}{\varphi(\lambda+1)} \alpha c_{T_0} - \alpha c_{T_0} \right] c_X = \beta c_X \quad (19)$$

$$\text{Where } \beta = \frac{\gamma \lambda^2}{\varepsilon(\lambda+1)} \alpha c_{T_0} - \frac{1-\varphi}{\varphi(\lambda+1)} \alpha c_{T_0} - \alpha c_{T_0}$$

Integration of the Eq. (19),  $c_X$  can be achieved.

$$\ln c_X \Big|_{c_{X_0}}^{c_X} = (\beta t + A) \Big|_0^t, \quad ,$$

$$c_X = e^{\beta t} c_{X_0} \quad (20)$$

The Eq. (20) indicates that target oligo is replicated exponentially with an amplification factor ( $F$ ) of  $e^{\beta t}$ , and the value of  $F$  is positively related to  $\gamma$  and  $\varphi$ .

### S3. Amplification fold simulation

**Table S2.** Outcome at each amplification cycle

| Amplification cycle | Released X                   | Total released X                                           | Total amount of X                                              |
|---------------------|------------------------------|------------------------------------------------------------|----------------------------------------------------------------|
| 1                   | $\varphi X$                  | $\varphi X$                                                | $\varphi X + X$                                                |
| 2                   | $\varphi(\varphi+1)X$        | $\varphi X + \varphi(\varphi+1)X$                          | $\varphi X + \varphi(\varphi+1)X + X$                          |
| 3                   | $\varphi(\varphi+1)^2 X$     | $\varphi X + \varphi(\varphi+1)X + \varphi(\varphi+1)^2 X$ | $\varphi X + \varphi(\varphi+1)X + \varphi(\varphi+1)^2 X + X$ |
| ⋮                   | ⋮                            | ⋮                                                          | ⋮                                                              |
| n                   | $\varphi(\varphi+1)^{n-1} X$ | $(\varphi+1)^n X - X$                                      | $(\varphi+1)^n X$                                              |

### S4. Hybridization of primer with standard or biotin template

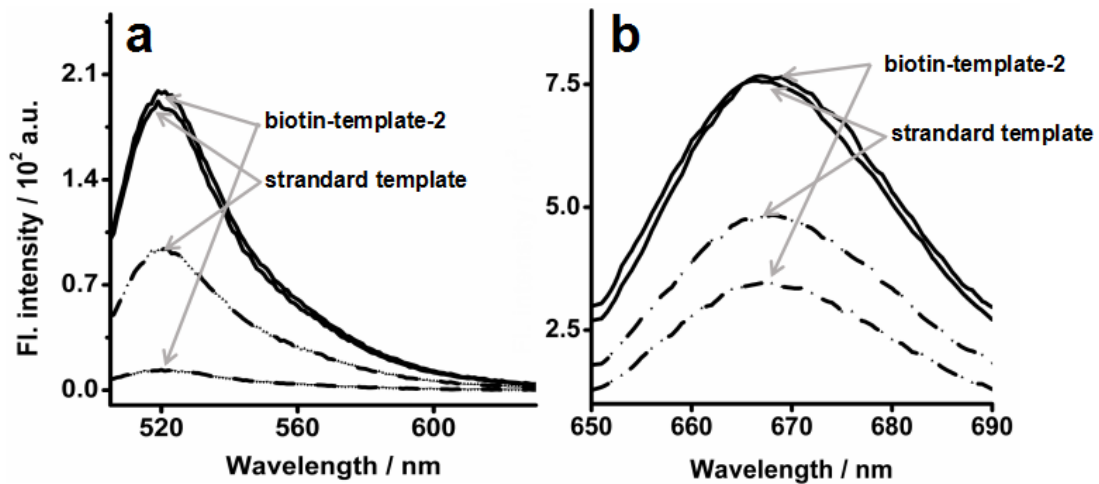

**Figure S1.** Hybridization of primer with standard or biotin template. Fluorescence spectra of the FAM/CY5-labelled standard template or biotin-template-2 before (solid lines) and after (dash lines) hybridized with the BHQ1/BHQ3-labelled let-7a under the excitation wavelengths of 490 nm (a) or 640 nm (b).

## S5. Ideal and experimental amplification fold

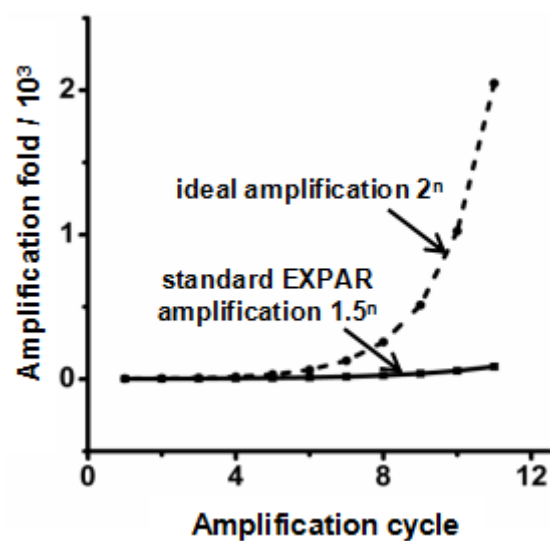

**Figure S2.** Simulation of the Ideal and experimental amplification fold. Plots for ideal and experimental amplification fold of EXPAR versus amplification cycle.

## S6. EXPAR on biotin-template-2,6

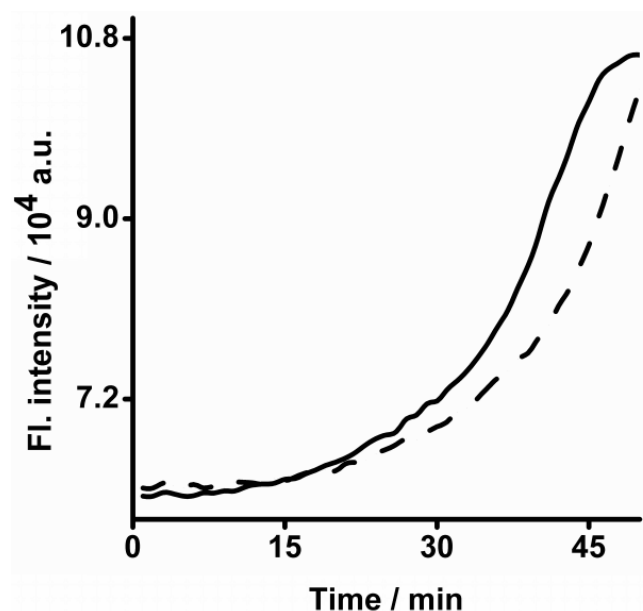

**Figure S3.** EXPAR on biotin-template-2,6. Real-time fluorescence spectra of EXPAR reactions at 55 °C in response to 10 fmol let-7a (solid line) or without let-7a (dash line). The EXPAR reactions were performed with 0.05 U  $\mu\text{L}^{-1}$  Vent (exo-) DNA polymerase, 0.4 U  $\mu\text{L}^{-1}$  Nt.BstNBI NEase, and 0.1  $\mu\text{M}$  biotin-template-2,6.

## S7. Optimization of the amount of DNA polymerase

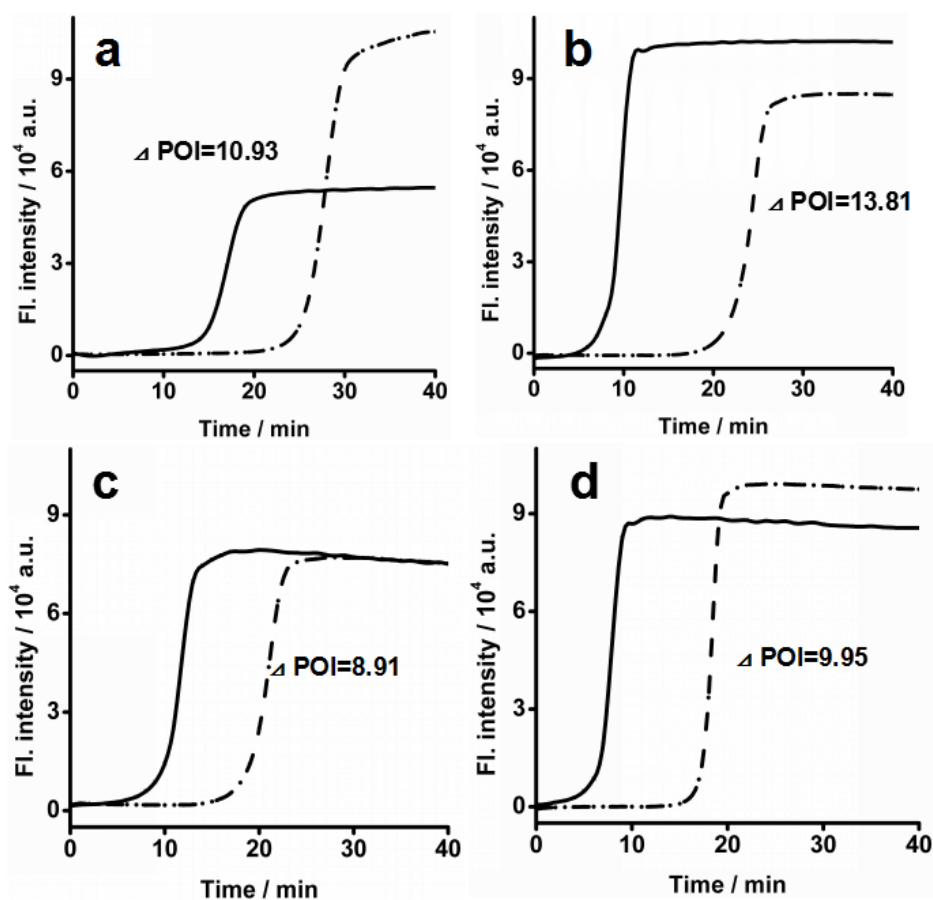

**Figure S4.** Optimization of the amount of DNA polymerase. Real-time fluorescence spectra of EXPAR reactions at 55 °C in response to 10 fmol let-7a (solid line) or without let-7a (dash line). The EXPAR reactions were performed with 0.4 U  $\mu L^{-1}$  Nt.BstNBI NEase, 0.1  $\mu M$  biotin-template-2, and (a) 0.02, (b) 0.05, (c) 0.08, and (d) 0.10 U  $\mu L^{-1}$  Vent (exo-) DNA polymerase. The maximum interval of the POI between the measurement of 10 fmol let-7a and blank (without let-7a) was found at the Vent (exo-) DNA polymerase of 0.05 U  $\mu L^{-1}$ .



## S8. Optimization of the amount of ENase

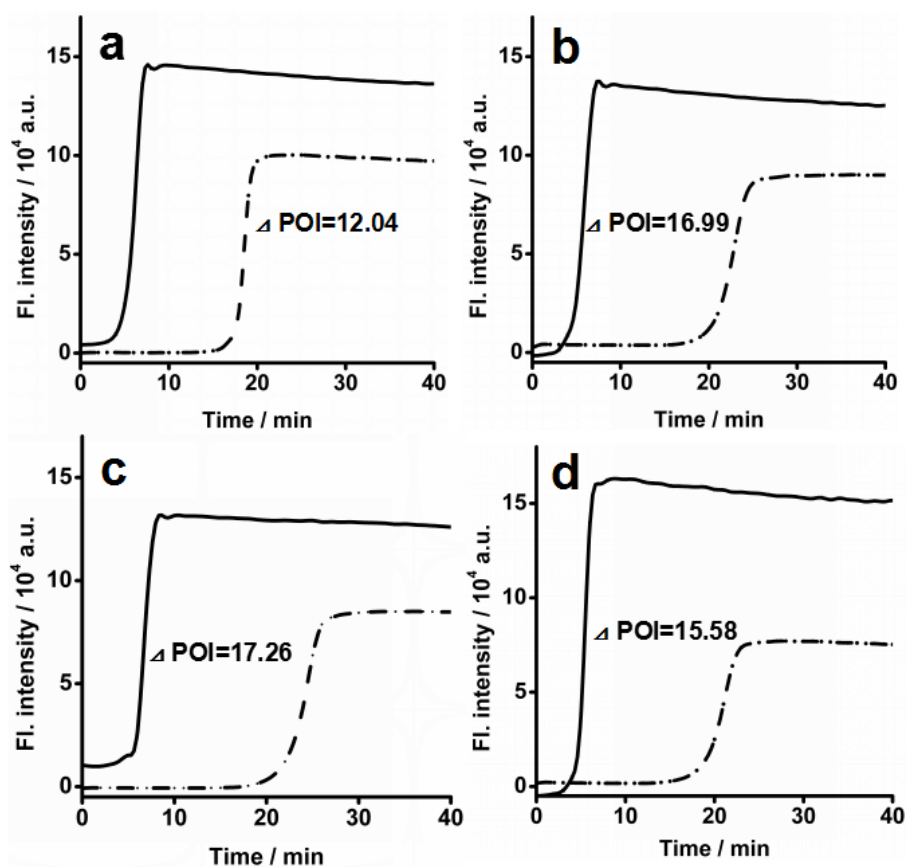

**Figure S5.** Optimization of the amount of Enase. Real-time fluorescence spectra of EXPAR reactions at 55 °C in response to 10 fmol let-7a (solid line) or without let-7a (dash line). The EXPAR reactions were performed with 0.05 U μL<sup>-1</sup> Vent (exo-) DNA polymerase, 0.1 μM biotin-templete-2, and (a) 0.2, (b) 0.3, (c) 0.4, and (d) 0.5 U μL<sup>-1</sup> Nt.BstNBI NEase. The maximum interval of the POI between the measurement of 10 fmol let-7a and blank (without let-7a) was found at the Nt.BstNBI NEase of 0.4 U μL<sup>-1</sup>.

## S9. Optimization of the amount of template

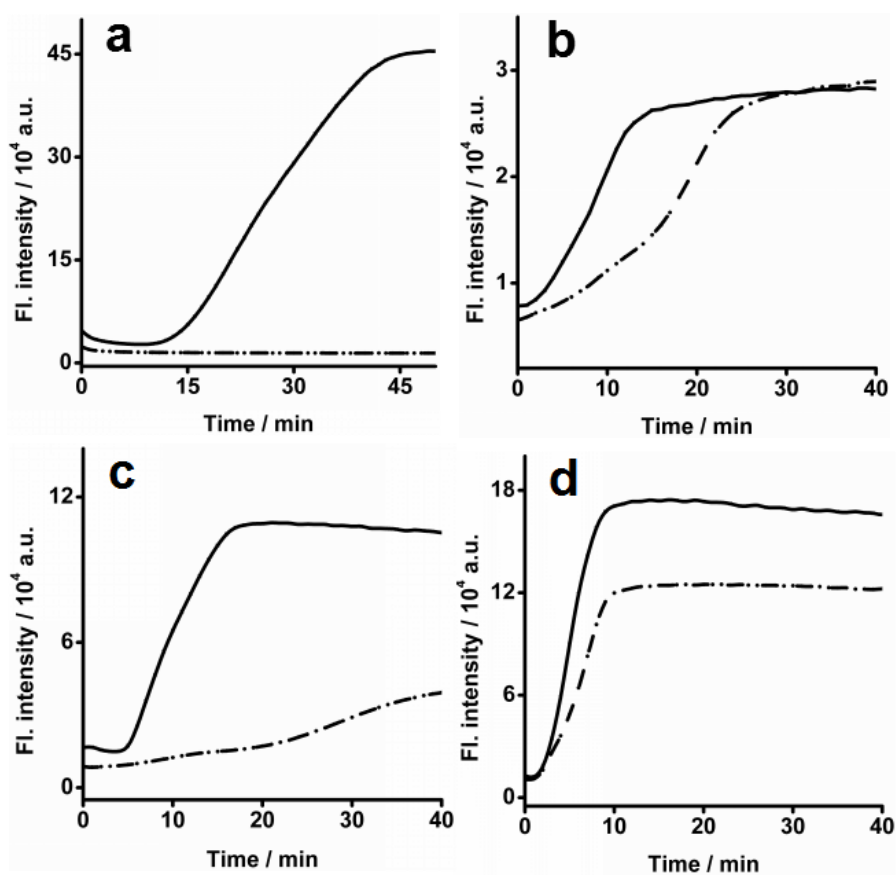

**Figure S6.** Optimization of the amount of template. Real-time fluorescence spectra of EXPAR reactions at 55 °C in response to 10 fmol let-7a (solid line) or without let-7a (dash line). The EXPAR reactions were performed with 0.05 U  $\mu$ L<sup>-1</sup> Vent (exo-) DNA polymerase, 0.4 U  $\mu$ L<sup>-1</sup> Nt.BstNBI NEase, and (a) 0.02, (b) 0.05, (c) 0.10, and (d) 0.20  $\mu$ M biotin-template-2. The utility of 0.02  $\mu$ M biotin-template-2 gives the maximum interval of the POI between the measurement of 10 fmol let-7a and blank (without let-7a), however, the amplification time is too long. In condensation of the reaction speed and sensitivity, the optimal template amount was chosen as 0.10  $\mu$ M.

## S10. Optimization of reaction temperature

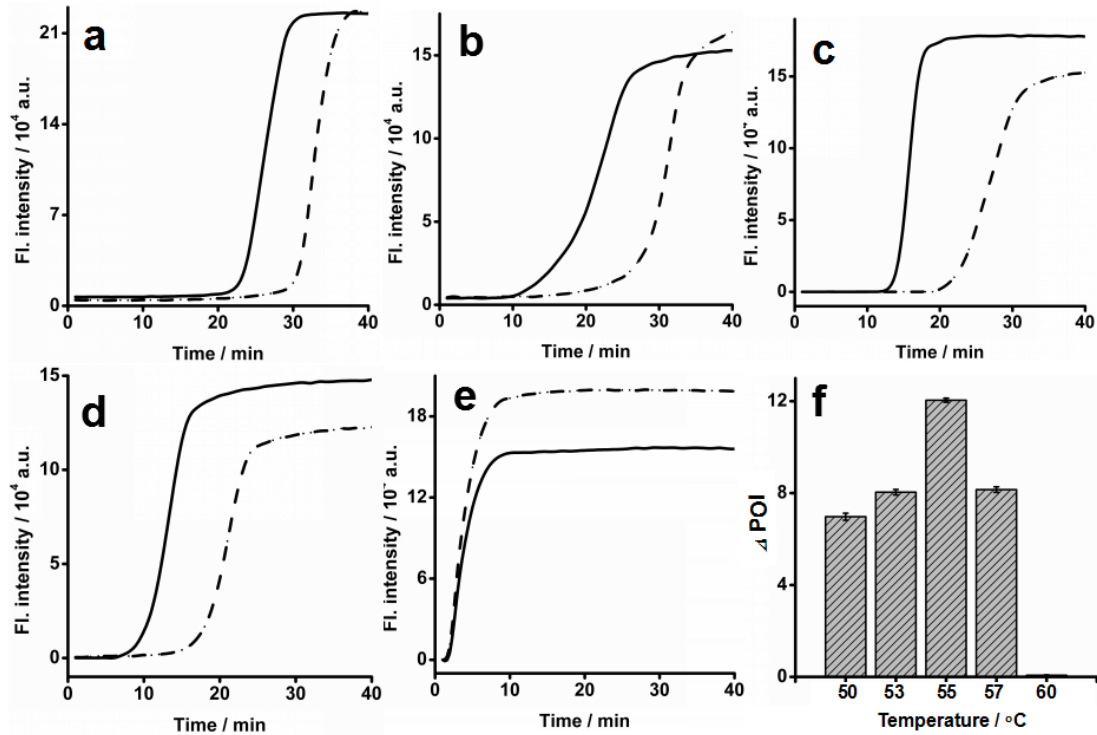

**Figure S7.** Optimization of reaction temperature. Real-time fluorescence spectra of EXPAR reactions in response to 10 fmol let-7a (solid line) or without let-7a (dash line). The EXPAR reactions were performed with 0.05 U  $\mu\text{L}^{-1}$  Vent (exo-) DNA polymerase, 0.4 U  $\mu\text{L}^{-1}$  Nt.BstNBI NEase, and 0.10  $\mu\text{M}$  biotin-template-2 at (a) 50 °C, (b) 53 °C, (c) 55 °C, (d) 57 °C and (e) 60 °C. (f) Histogram of  $\Delta\text{POI}$  with temperature. The maximum interval of the POI between the measurement of 10 fmol let-7a and blank (without let-7a) was found at 55 °C.

## S11. Estimation of interference of EXPAR

The interferences for the detection of let-7a arisen from its family members were evaluated as follows. Assuming the correlation equation for let-7a determination is  $\text{POI} = b + a \lg A_{\text{miRNA}}$ .

Therefore,  $\text{POI}_{\text{let-7x}} - \text{POI}_{\text{let-7a}} = a(\lg A_{\text{let-7x}} - \lg A_{\text{let-7a}})$ ,  $\lg \frac{A_{\text{let-7x}}}{A_{\text{let-7a}}} = \frac{\text{POI}_{\text{let-7x}} - \text{POI}_{\text{let-7a}}}{a}$ . The

$$\text{interference (I)} = 10^{\frac{\text{POI}_{\text{let-7x}} - \text{POI}_{\text{let-7a}}}{a}}$$

**Table S3.** Evaluation of the interference for biotin-template based EXPAR

|     | Let-7a | Let-7b               | Let-7c               | Let-7d               | Let-7e | Let-7f               | Let-7g               | Let-7i               |
|-----|--------|----------------------|----------------------|----------------------|--------|----------------------|----------------------|----------------------|
| POI | 12.6   | 25.75                | 23.71                | 19.07                | 14.47  | 20.32                | 21.28                | 26.11                |
| I   | —      | $1.5 \times 10^{-5}$ | $1.4 \times 10^{-4}$ | $4.4 \times 10^{-2}$ | 9.33   | $1.1 \times 10^{-2}$ | $2.3 \times 10^{-3}$ | $1.0 \times 10^{-5}$ |

**Table S4.** Evaluation of the interference for standard EXPAR

|     | Let-7a | Let-7b               | Let-7c               | Let-7d | Let-7e | Let-7f | Let-7g | Let-7i               |
|-----|--------|----------------------|----------------------|--------|--------|--------|--------|----------------------|
| POI | 24.06  | 31.62                | 28.61                | 26.14  | 25.22  | 26.68  | 27.79  | 32.13                |
| I   | —      | $1.9 \times 10^{-4}$ | $3.6 \times 10^{-2}$ | 2.7    | 13.2   | 1.04   | 0.15   | $7.8 \times 10^{-5}$ |

**Table S5.** Evaluation of the interference for toehold/biotin-template-based EXPAR

|     | Let-7a | Let-7b               | Let-7c               | Let-7d               | Let-7e               | Let-7f               | Let-7g               | Let-7i               |
|-----|--------|----------------------|----------------------|----------------------|----------------------|----------------------|----------------------|----------------------|
| POI | 14.05  | 27.12                | 25.79                | 23.02                | 21.86                | 24.32                | 24.94                | 27.53                |
| I   | —      | $2.7 \times 10^{-5}$ | $1.2 \times 10^{-4}$ | $3.2 \times 10^{-3}$ | $1.2 \times 10^{-2}$ | $6.9 \times 10^{-4}$ | $3.4 \times 10^{-4}$ | $1.7 \times 10^{-5}$ |

## S12. Melting temperature investigation of toehold/biotin-template-2

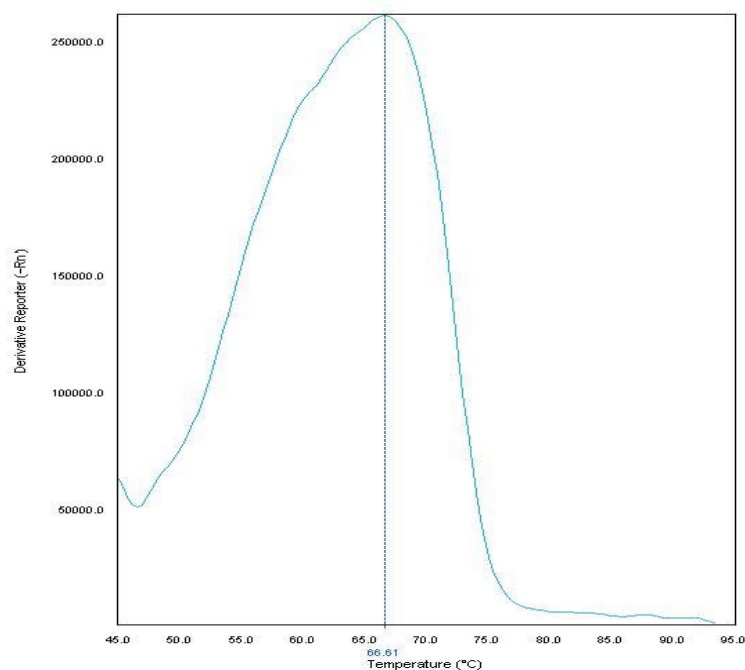

**Figure S8.** Melting temperature investigation of toehold/biotin-template-2. T<sub>m</sub> curves were obtained from the derivative of fluorescence intensity signal as the function of temperature.

**S13. Table S6.** Comparison of the analytical performance of different methods<sup>a</sup>

| Methods                   | Amplification mode | Detection limit | Dynamic range (orders of magnitude) | reference |
|---------------------------|--------------------|-----------------|-------------------------------------|-----------|
| Microarray                | –                  | 1 fmol          | 2                                   | 1         |
| Northern blotting         | –                  | 1 fmol          | 3                                   | 2         |
| Bioluminescence           | –                  | 1 fmol          | 5                                   | 3         |
| competitive binding assay | –                  | 228 amol        | 5                                   | 4         |
| Electrochemistry          | –                  | 200 amol        | 4                                   | 5         |
| DSNSA                     | Linear             | 80 amol         | 4                                   | 6         |
| Branched RCA              | Linear             | 6 amol          | 3                                   | 7         |

|                            |             |            |    |           |
|----------------------------|-------------|------------|----|-----------|
| SPRI                       | Linear      | 5 amol     | 4  | 8         |
| Hairpin-based EXPAR        | Exponential | 3.8 amol   | 4  | 9         |
| LCR                        | Linear      | 3.5 amol   | 3  | 10        |
| SDA                        | Linear      | 2.1 amol   | 4  | 11        |
| LAMP                       | Exponential | 1 amol     | 6  | 12        |
| CPB                        | Linear      | 1 amol     | 1  | 13        |
| GO-based EXPAR             | Exponential | 540 zmol   | 3  | 14        |
| Exponential SDA            | Exponential | 16 zmol    | 9  | 15        |
| P-ERCA                     | Exponential | 0.24 zmol  | 3  | 16        |
| EXPAR                      | Exponential | 0.1 zmol   | 10 | 17        |
| HQEA                       | Quadratic   | 0.05 zmol  | 5  | 18        |
| Biotin-based EXPAR         | Exponential | 0.001 zmol | 12 | This work |
| Toehold/biotin-based EXPAR | Exponential | 0.01 zmol  | 10 | This work |

---

<sup>a</sup>Summary of homogeneous binding assays for the detection of nucleic acid with detection scheme of fluorescent. DSNSA: duplex-specific nuclease signal amplification; RCA: rolling circle amplification; SPRI: Surface plasmon resonance imaging; Hairpin-based EXPAR: Hairpin Probe-Based Circular Exponential Amplification; LCR: ligase chain reaction; SDA: strand-displacement amplification; LAMP: loop-mediated isothermal amplification; CPB: conjugated-polymer-based methods; GO-based EXPAR: graphene oxide (GO) fluorescence switch-based circular exponential amplification; Exponential-SDA: Exponential Strand-Displacement Amplification; P-ERCA: padlock probe-based exponential rolling circle amplification; EXPAR: exponential amplification reaction; HQEA: hairpin-mediated quadratic enzymatic amplification

## REFERENCES

1. Lee, J. M., Cho, H. and Jung, Y. (2010) Fabrication of a structure-specific RNA binder for

- array detection of label-free microRNA. *Angew. Chem. Int. Ed.*, **49**, 8662–8665.
2. Válóczy, A., Hornyik, C., Varga, N., Burgyán, J., Kauppinen, S. and Havelda, Z. (2004) Sensitive and specific detection of microRNAs by northern blot analysis using LNA-modified oligonucleotide probes. *Nucleic Acids Res.*, **32**, e175.
  3. Cissell, K. A., Rahimi, Y., Shrestha, S., Hunt, E. A. and Deo, S. K. (2008) Bioluminescence-based detection of microRNA, miR21 in breast cancer cells. *Anal. Chem.*, **80**, 2319–2325.
  4. Wang, W., Kong, T., Zhang, D., Zhang, J. A. and Cheng, G. S. (2015) Label-free microRNA detection based on fluorescence quenching of gold nanoparticles with a competitive hybridization. *Anal. Chem.*, **87**, 10822–10829.
  5. Gao, Z. and Yang, Z. (2006) Detection of microRNAs using electrocatalytic nanoparticle tags. *Anal. Chem.*, **78**, 1470–1477.
  6. Lin, X., Zhang, C., Huang, Y., Zhu, Z., Chen, X. and Yang, C. J. (2013) Backbone-modified molecular beacons for highly sensitive and selective detection of microRNAs based on duplex specific nuclease signal amplification. *Chem. Commun.*, **49**, 7243–7245.
  7. Cheng, Y. Q., Zhang, X., Li, Z. P., Jiao, X., Wang, Y. and Zhang, Y. (2009) Highly sensitive determination of microRNA using target-primed and branched rolling-circle amplification. *Angew. Chem. Int. Ed.*, **48**, 3268–3272.
  8. Fang, S., Lee, H. J., Wark, A. W. and Corn, R. M. (2006) Attomole microarray detection of microRNAs by nanoparticle-amplified SPR imaging measurements of surface polyadenylation reactions. *J. Am. Chem. Soc.*, **128**, 14044–14046.
  9. Wang, G. L. and Zhang, C. Y. (2012) Sensitive detection of microRNAs with hairpin probe-based circular exponential amplification assay. *Anal. Chem.*, **84**, 7037–7042.
  10. Yan, J. L., Li, Z. P., Liu, C. H. and Cheng, Y. Q. (2010) Simple and sensitive detection of microRNAs with ligase chain reaction. *Chem. Commun.*, 2010, **46**, 2432–2434.
  11. Dong, H., Zhang, J., Ju, H., Lu, H., Wang, S., Jin, S., Hao, K., Du, H. and Zhang, X. (2012) Highly sensitive multiple microRNA detection based on fluorescence quenching of graphene oxide and isothermal strand-displacement polymerase reaction. *Anal. Chem.* 2012, **84**, 4587–4593.

12. Li, C. P., Li, Z. P., Jia, H. X. and Yan, J. L. (2011) One-step ultrasensitive detection of microRNAs with loop-mediated isothermal amplification (LAMP). *Chem. Commun.*, 2011, **47**, 2595–2597.
13. Fan, Y., Chen, X. T., Trigg, A. D., Tung, C., Kong, J. M. and Gao, Z. Q. (2007) Detection of microRNAs using target-guided formation of conducting polymer nanowires in nanogaps. *J. Am. Chem. Soc.*, **129**, 5437–5443.
14. Liu, H. Y., Li, L., Wang, Q., Duan, L. L. and Tang, B. (2014) Graphene fluorescence switch-based cooperative amplification: a sensitive and accurate method to detection microRNA. *Anal. Chem.*, **86**, 5487–5493.
53. Shi, C., Liu, Q., Ma, C. P. and Zhong, W. W. (2014) Exponential strand-displacement amplification for detection of microRNAs. *Anal. Chem.*, **86**, 336–339.
16. Liu, H. Y., Li, L., Duan, L. L., Wang, X., Xie, Y. X., Tong, L. L., Wang, Q. and Tang, B. (2013) High specific and ultrasensitive isothermal detection of microRNA by padlock probe-based exponential rolling circle amplification. *Anal. Chem.*, **85**, 7941–7947.
17. Jia, H., Li, Z. P., Liu, C. and Cheng, Y. Q. (2010) Ultrasensitive detection of microRNAs by exponential isothermal amplification. *Angew. Chem. Int. Ed.*, **49**, 5498–5501.
18. Duan, R. X., Zuo, X. L., Wang, S. T., Quan, X. Y., Chen, D. L., Chen, Z. F., Jiang, L., Fan, C. H. and Xia, F. (2013) Lab in a tube: ultrasensitive detection of microRNAs at the single-cell level and in breast cancer patients using quadratic isothermal amplification. *J. Am. Chem. Soc.*, **135**, 4604–4607.
